# Supplementary material
Source: Springer Nature journal article supplement (https://www.springermedizin.de/resource/supplementary/13075_2011_3552_MOESM3_ESM.pdf/9694808)

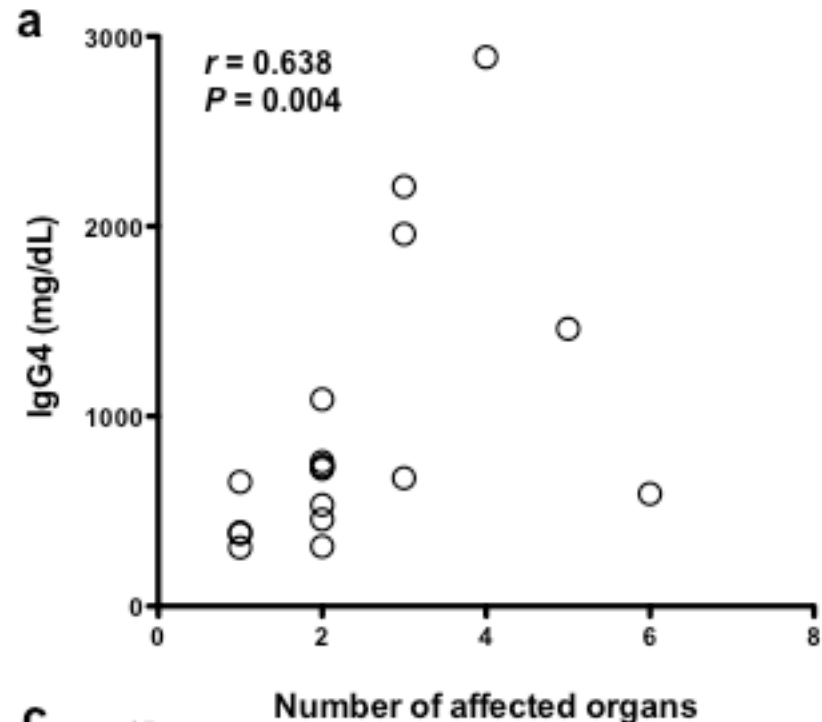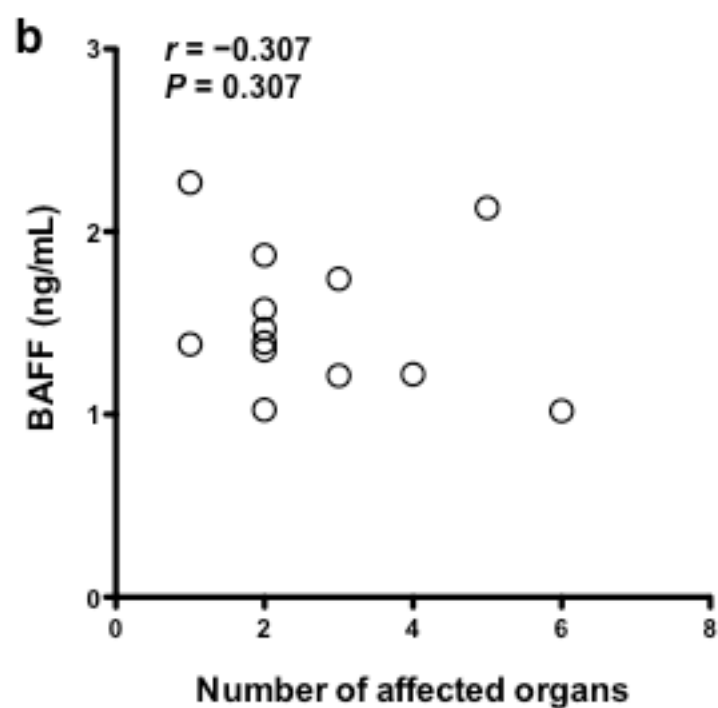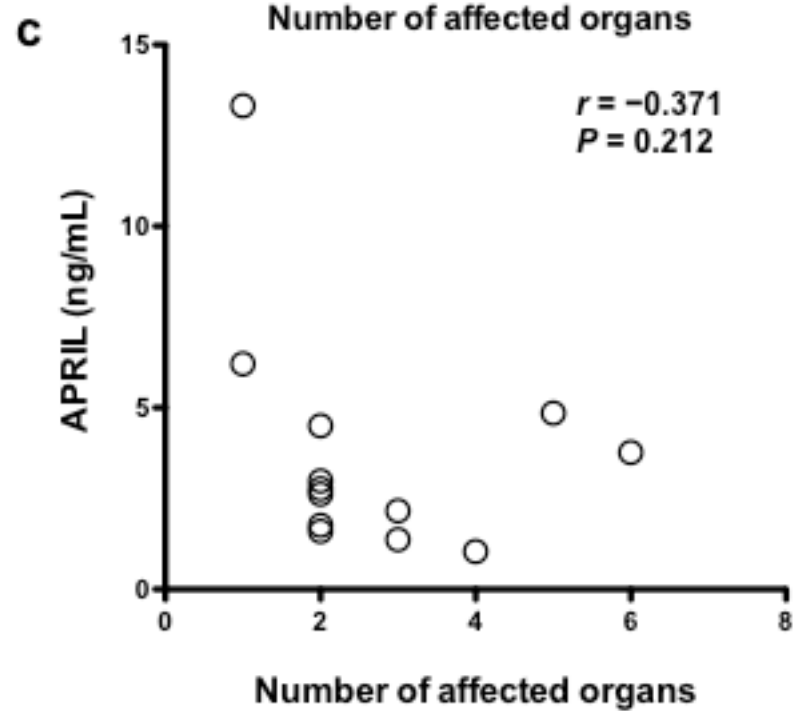

Supplement: MOESM3 [file 9694808]
